# Supplementary material for: Cytotoxicity evaluation of sodium lauryl sulfate in a paper-based 3D cell culture system
Source: Royal Society of Chemistry journal article supplement (doi:10.1039/d2ay00161f), 2022-01-01
Supplement: d2ay00161f1.pdf [file d2ay00161f1.pdf]

## Supplementary Information

Cytotoxicity evaluation of sodium lauryl sulfate in a paper-based 3D cell culture system

Young Ju Lee<sup>a</sup>, Yong Jin Ahn<sup>b</sup>, Gi-Ja Lee<sup>a,b,\*</sup>

<sup>a</sup>Dept. of Biomedical Engineering, College of Medicine, Kyung Hee University, Seoul 02447, Korea

<sup>b</sup>Dept. of Medical Engineering, Kyung Hee University Graduate School, Seoul 02447, Korea

\* To whom correspondence should be addressed. E-mail: [gjlee@khu.ac.kr](mailto:gjlee@khu.ac.kr)

**Table S1.** Characteristics of Whatman® filter paper

| No.       | Pore size ( $\mu\text{m}$ ) | Wet burst (psi) | Thickness ( $\mu\text{m}$ ) |
|-----------|-----------------------------|-----------------|-----------------------------|
| Grade 1   | 11                          | 0.25            | 180 $\mu\text{m}$           |
| Grade 2   | 8                           | 0.29            | 190 $\mu\text{m}$           |
| Grade 114 | 25                          | 8.9             | 190 $\mu\text{m}$           |

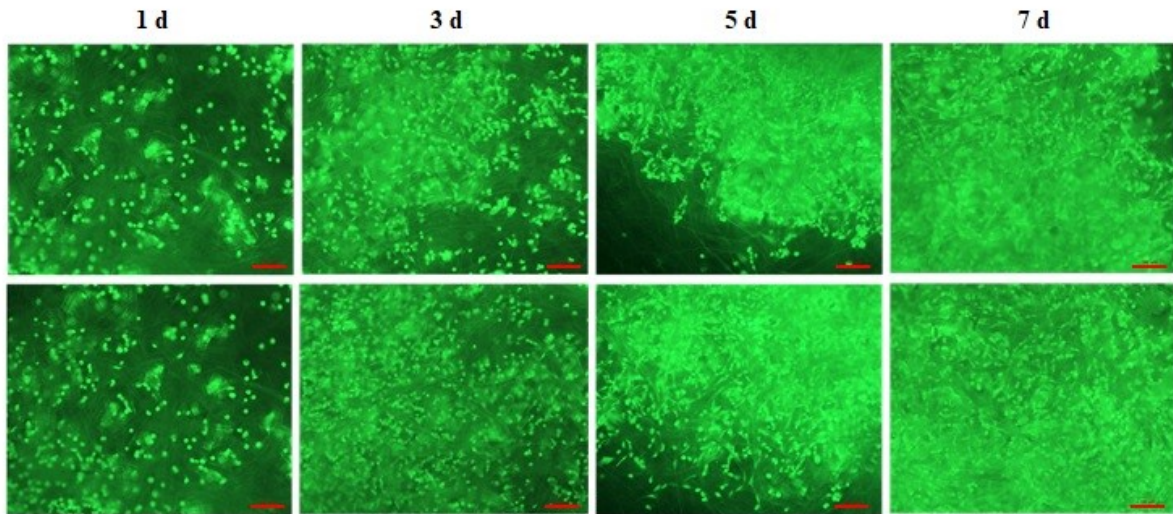

**Figure S1.** Representative fluorescence images of Live/Dead staining of L929 cells ( $3 \times 10^2$  cells/zone) cultured on the grade 1 paper for 1, 3, 5 or 7 d. The scale bar represents 100  $\mu\text{m}$ .

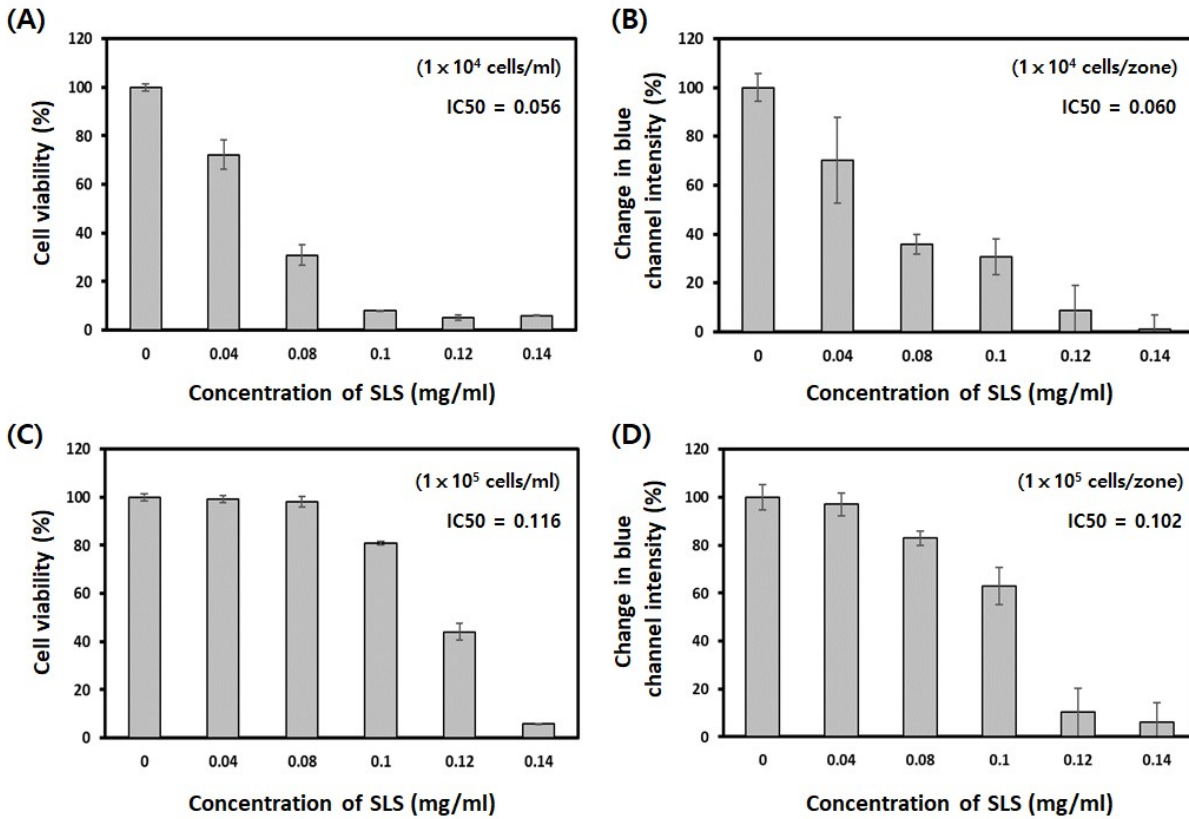

**Figure S2.** Toxicity evaluation in (A, C) monolayer 2D culture and (B, D) paper-based 3D culture of L929 cells with different cell numbers using a colorimetric analysis. Mouse L929 fibroblast cells were seeded with (A, B)  $1 \times 10^4$  cells/ml or zone and (C, D)  $1 \times 10^5$  cells/ml or zone, and were treated with various concentrations of SLS and incubated for 24 h. Cell cytotoxicity was measured using the WST assay.
